# Supplementary material for: Preoperative Detection of the TERT Promoter Mutations in Papillary Thyroid Carcinomas
Source: Research Square preprint supplement (doi:10.21203/rs.3.rs-228278/v1), 2021-02-24
Supplement: Supplementary file 2 [file fd946f645ef7a7d408f734d3.docx]

**Preoperative detection of the *TERT* promoter mutations in papillary thyroid carcinomas**

Tomoe Nakao,1,2 *Michiko Matsuse,2 Vladimir Saenko,3 Tatiana Rogounovitch,3

Aya Tanaka,4 Keiji Suzuki,2 Miyoko Higuchi,5 Hisanori Sasai,6 Tutomu Sano,6 Mitsuyoshi Hirokawa,7 Akira Miyauchi,8 Atsushi Kawakami,2 and Norisato Mitsutake1

**Supplementary file 1**

**Determination of the cutoff limits for detection of the *TERT* promoter mutation by ddPCR**

1. *Minimum TERTmut%* *significantly exceeding the false-positive background*

The ddPCR technique used to detect the *TERT* promoter (*TERT*-p) mutation displays false-positive droplet calls in a DNA copy-dependent manner. We used the Kruskal-Wallis test with the Dunnet posttest to determine the minimum *TERTmut%* which ensures statistically significant difference from the background value (corresponding to 0% mutant allele) at a given total DNA copy number in a reaction (see Supplementary Figure 2). These results are summarized in Supplementary file 1 Table 1.

**Supplementary file 1 Table 1**. Minimum *TERTmut%* in a ddPCR reaction resulting in the statistically significant difference from the background at a given total DNA copy number.

| **Expected (nominal) total DNA copies** | **Observed total DNA copies (average)**a | **Expected(nominal)minimum *TERTmut%***b | **Observed *TERTmut%* (average)** |
| --- | --- | --- | --- |
| 250 | 241 | 1.0 | 1.49 |
| 500 | 509 | 1.0 | 1.41 |
| 1000 | 832 | 1.0 | 1.40 |
| 3000 | 3045 | 0.5 | 0.66 |
| 6000 | 6223 | 0.5 | 0.62 |
| 12000 | 13305 | 0.5 | 0.62 |

a rounded to the nearest greater integer

b expected (nominal) minimum *TERTmut%* resulting in the statistically significant difference from the background


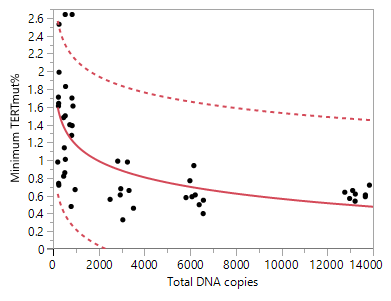
The distribution of the minimum *TERTmut%* values significantly exceeding those in the background by the total number of DNA copies in a ddPCR reaction is shown in Supplementary file 1 Figure 1.

**Supplementary file 1 Figure 1**. Minimum *TERTmut%* values statistically significantly exceeding those from the false-positive background in relation to the total number of DNA copies in a ddPCR reaction. Solid line represents logarithmic fit of data points, dotted lines indicate the 95% prediction interval for an individual minimum *TERTmut%* value.

Data points were fitted using a logarithmic function in JMP 15 Pro software:

,

where ,

and the 95% prediction interval for an individual value was calculated and saved as a formula. The formula for the upper prediction interval limit was as follows (as appears in JMP Formula Window):

PI Upper( "Add",

"Expression",

Formula(

3.00064490487188 + -0.264372243557457 * Log( :Total DNA copies )

+2.01289559891943 * Sqrt(

Vec Quadratic(

[0.595175750917144 -0.0771243978949013, -0.0771243978949013

0.0103564921700791],

[1] || Log( :Total DNA copies )

) * 0.218757569569557 + 0.218757569569557

)

)

); [1]

Thus, formula [1] determines the cutoff of the minimum *TERTmut%* in a ddPCR reaction required to obtain the *TERTmut%* value statistically significantly exceeding that from the false positive background at a given number of total DNA copies. The formula was used to calculate the *TERTmut%* cutoff over the range of total DNA copies in JMP 15 Pro software as presented in Figure 2 of the main manuscript and in Supplementary file 1 Figure 3.

Any data point above the cutoff is interpreted as positive for the *TERT*-p mutation.

*2. Definition of the limits of inadequate samples*

Since the purpose of our study was to evaluate the performance of ddPCR in detecting the *TERT*-p mutation in FNA samples, one should bear in mind that some FNA specimens may contain insufficient number of the material sampled from a thyroid nodule, which may result in a “nondiagnostic/unsatisfactory” cytopathology. Applicably to the ddPCR, insufficient material may result in the absence (or in too few) of wild-type *TERT*-p calls, which in the absence of the *TERT*-p mutant calls do not allow to define the sample as wild-type.

This subsection describes our calculations of the minimum number of the *TERT*-p wild-type calls (nneg), and corresponding *TERTmut%* and *total DNA copy* number values that define the nondiagnostic limit.

*2.1*. Recall that the percentage of *TERTmut* copies (*TERTmut%*) is defined as follows:

[2]

*2.2*. *Relationship between the TERT-p wild-type or mutant copy number with the number of corresponding calls*

The number of the *TERT*-p DNA copies in a ddPCR reaction, either mutant or wild-type, is automatically calculated by QuantaSoft software based on the number of positive () or negative () calls, respectively, accounting for the number of valid (accepted) droplets; all these data are included in the ddPCR run report. We used linear regression forced through the origin to approximate *TERTmut* or *TERTwt* copies by the number of positive or negative calls, respectively, i.e.:

*TERTmut copies* , and

*TERTwt copies* .

The results of these calculations are presented in Supplementary file 1 Figure 2.

**A** **B**


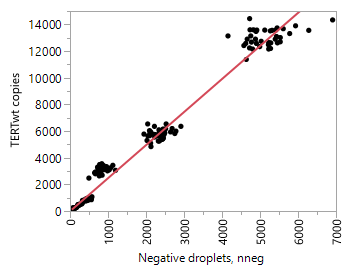

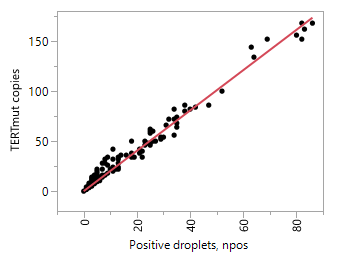


**Supplementary file 1 Figure 2**. Linear regression-based determination of the *TERT* promoter (A) mutant (*TERTmut*) or (B) wild-type (*TERTwt*) copy number through the number of positive or negative calls (droplets), respectively. The obtained estimates were as follows: *bmut* = 2.017 (1.990–2.044) (95%CI), *r2* = 0.989, *p* = 4.836E-235; *bwt*= 2.479 (2.445–2.512) (95%CI), *r2* = 0.989, *p* = 1.680E-234.

Thus, the number of either *TERTmut* or *TERTwt* copies is determined by the number of corresponding calls (droplets) as follows:

*=* 2.017*⋅* [3]

*=* 2.479*⋅*  [4],

*2.3.* Inputting formulas [3] and [4] into [2] yields the following definition of :

[5]

Since the natural limit for the minimal number of calls (registered droplets) in a ddPCR reaction is 1, formula [5] is converted to the following when :

% [6]

*2.4*. The minimal number of *TERTwt* calls (i.e. negative droplets, ) at which 1 positive call becomes interpretable is determined by the condition:

> minimum *TERTmut%* ;

the minimum *TERTmut%* (i.e., the cutoff value) was determined above in formula [1], and therefore solving the equation

[6] = [1]

for *nneg* would yield the minimum number of wild-type *TERT*-p calls below which the results of a ddPCR reaction in the absence of mutant calls could not be interpreted. One may see here some parallelism to the “nondiagnostic/unsatisfactory” cytopathology, which applicably to ddPCR means insufficient template DNA in a reaction to deem the absence of mutant *TERT*-p calls an evidence of the wild-type statusof the *TERT* promoter. The minimum *TERTmut%* and the minimum *Total DNA copies* corresponding to the determined *nneg* (*nneg*=25) were calculated and are presented in Supplementary file 1 Table 2.

**Supplementary file 1 Table 2**. Calculated values of the minimum *TERTmut%* and the minimum *Total DNA copies* defining the nondiagnostic limit.

| **Minimum *nneg*** | **Minimum *TERTmut%*** | **Minimum *Total DNA copies*** |
| --- | --- | --- |
| 25* | 3.15 | 64* |

* rounded to the nearest greater integer

The obtained estimates were used to interpret mutational status of the *TERT* promoter in FNA and FFPE samples based on the values of *Total DNA copies* (the abscissa) and *TERTmut%* (the ordinate) for each data point as schematically shown in Supplementary file 1 Figure 2.

**Supplementary file 1 Figure 3**. Schematic presentation of the areas defining mutational status of the *TERT* promoter based on a ddPCR result.
